# Supplementary material for: Modular Hub Genes in DNA Microarray Suggest Potential Signaling Pathway Interconnectivity in Various Glioma Grades
Source: MDPI journal article supplement (doi:10.3390/biology13040206), 2024-03-23
Supplement: s1 [file s1]

## Supplementary Materials

### Modular Hub Genes in DNA Microarray Suggests Potential Signaling Pathway Interconnectivity in Various Glioma Grades

Marco A. Orda, Peter Matthew T. Fowler, and Lemmuel L. Tayo

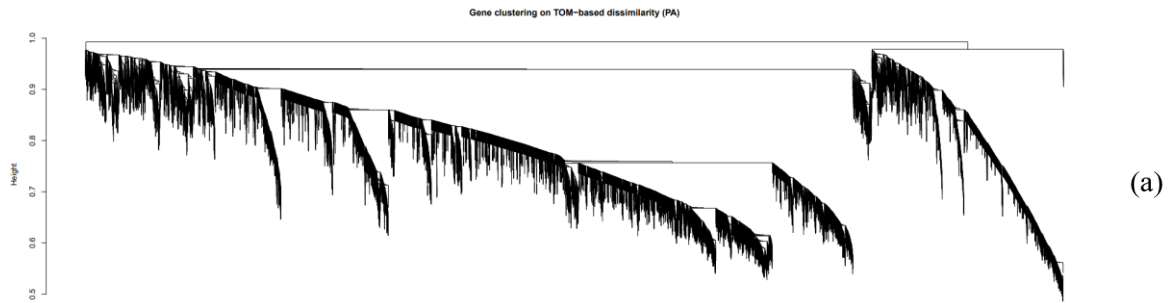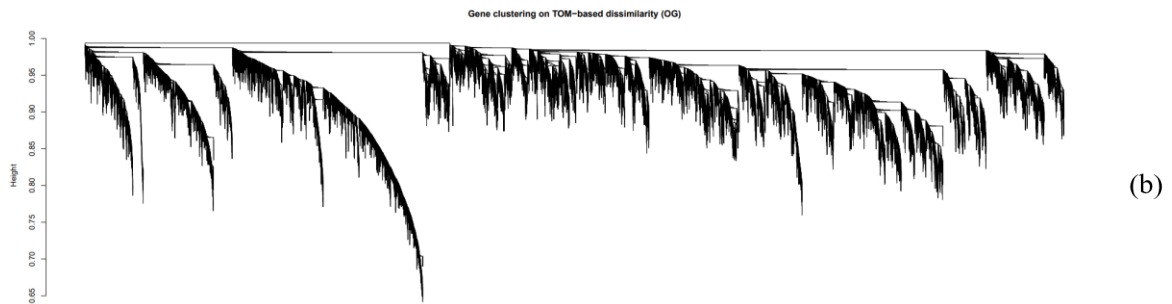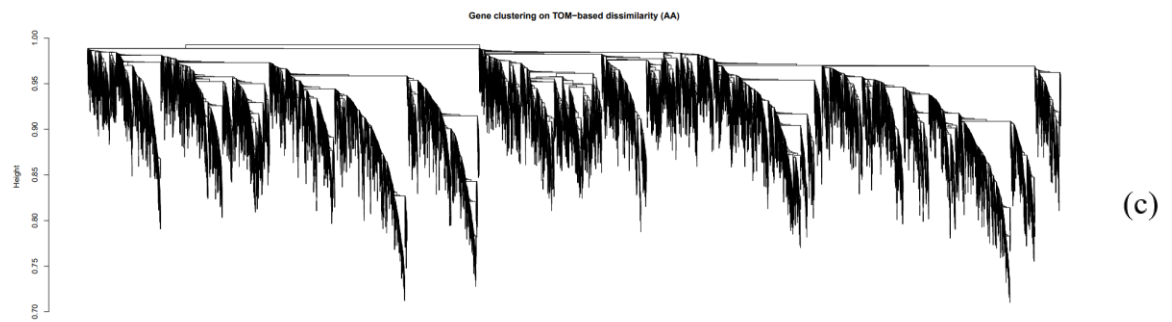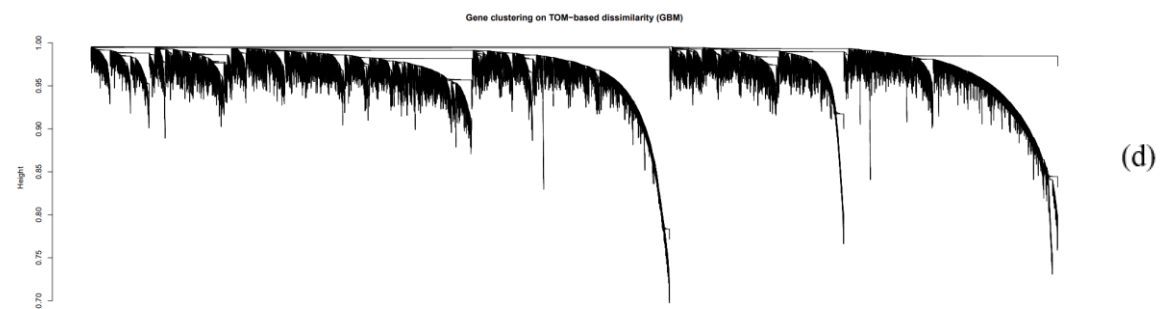

**Figure S1.** TOM-based dissimilarity clustering of (a) PA, (b) OG, (c) AA, and (d) GBM datasets.

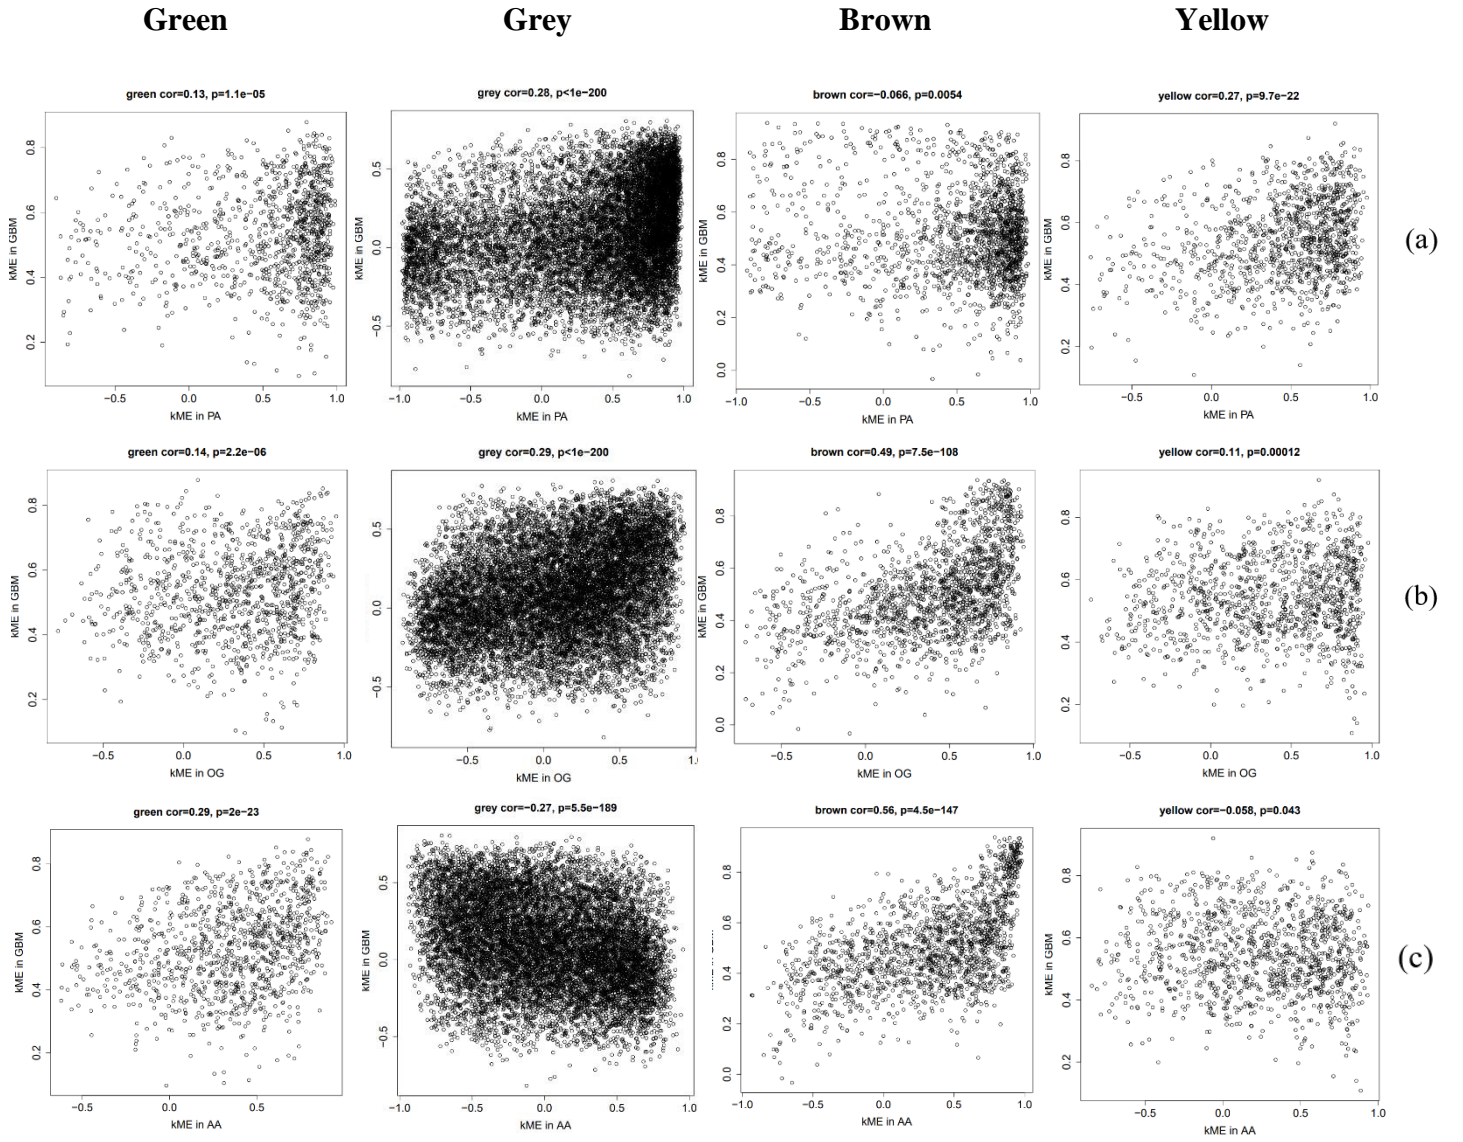

**Figure S2.** Summary of in-module connectivities of genes in highly preserved modules across all datasets referenced in GBM and plotted against (a) PA, (b) OG, and (c) AA datasets.
